# Supplementary material for: Intramolecular charge-transfer fluorescence of 1-phenyltridecamethylbicyclo[2.2.2]octasilane
Source: Royal Society of Chemistry journal article supplement (doi:10.1039/b505109f), 2005-01-01
Supplement: b505109f.pdf [file b505109f.pdf]

## Supplementary Information

# Intramolecular Charge-Transfer Fluorescence of 1-Phenyltridecamethylbicyclo[2.2.2]octasilane

*Wataru Setaka, Natsuki Hamada, Chizuko Kabuto and Mitsuo Kira\**

*Department of Chemistry, Graduate School of Science, Tohoku University, Aoba-ku, Sendai 980-8578, Japan. Fax: +81-22-795-6589; Tel: +81-22-795-6585; E-mail: mkira@si.chem.tohoku.ac.jp*

(Total 10 pages including this cover page)

### Table of Contents

1. X-ray Structural Analysis of 1-Phenylbicyclo[2.2.2]octasilane (**1**)
  1. Experimental data
  2. ORTEP drawing of **1**
  3. Crystal packing of **1**
  4. Atomic parameters
2. Fluorescence Spectra of Phenyl[tris(trimethylsilyl)]silane (**4**) in Various Solvents

## 1. X-ray Structural analysis of 1-phenylbicyclo[2.2.2]octasilane (1)

**Table S1.** Crystal data and structure refinement for 1-phenylbicyclo[2.2.2]octasilane (1).

|                                   |                                                                                                                                                        |
|-----------------------------------|--------------------------------------------------------------------------------------------------------------------------------------------------------|
| Identification code               | PhBCOS                                                                                                                                                 |
| Empirical formula                 | C <sub>19</sub> H <sub>44</sub> Si <sub>8</sub>                                                                                                        |
| Formula weight                    | 497.26                                                                                                                                                 |
| Temperature                       | 173(2) K                                                                                                                                               |
| Wavelength                        | 0.71070 Å                                                                                                                                              |
| Crystal system                    | Monoclinic                                                                                                                                             |
| Space group                       | <i>P</i> 2 <sub>1</sub> / <i>n</i>                                                                                                                     |
| Unit cell dimensions              | a = 9.9526(5) Å                      α = 90°.<br>b = 16.4089(9) Å                     β = 92.026(3)°.<br>c = 18.5655(11) Å                    γ = 90°. |
| Volume                            | 3030.1(3) Å <sup>3</sup>                                                                                                                               |
| Z                                 | 4                                                                                                                                                      |
| Density (calculated)              | 1.090 Mg/m <sup>3</sup>                                                                                                                                |
| Absorption coefficient            | 0.360 mm <sup>-1</sup>                                                                                                                                 |
| F(000)                            | 1080                                                                                                                                                   |
| Crystal size                      | 0.30 x 0.20 x 0.10 mm <sup>3</sup>                                                                                                                     |
| Theta range for data collection   | 3.20 to 27.48°.                                                                                                                                        |
| Index ranges                      | 0 ≤ h ≤ 12, 0 ≤ k ≤ 21, -24 ≤ l ≤ 24                                                                                                                   |
| Reflections collected             | 6868                                                                                                                                                   |
| Independent reflections           | 6868 [R(int) = 0.0000]                                                                                                                                 |
| Completeness to theta = 27.48°    | 99.1 %                                                                                                                                                 |
| Absorption correction             | Semi-empirical from equivalents                                                                                                                        |
| Max. and min. transmission        | 0.9649 and 0.8997                                                                                                                                      |
| Refinement method                 | Full-matrix least-squares on F <sup>2</sup>                                                                                                            |
| Data / restraints / parameters    | 6868 / 0 / 244                                                                                                                                         |
| Goodness-of-fit on F <sup>2</sup> | 1.064                                                                                                                                                  |
| Final R indices [I > 2σ(I)]       | R1 = 0.0425, wR2 = 0.1082                                                                                                                              |
| R indices (all data)              | R1 = 0.0607, wR2 = 0.1168                                                                                                                              |
| Largest diff. peak and hole       | 0.885 and -0.421 e.Å <sup>-3</sup>                                                                                                                     |

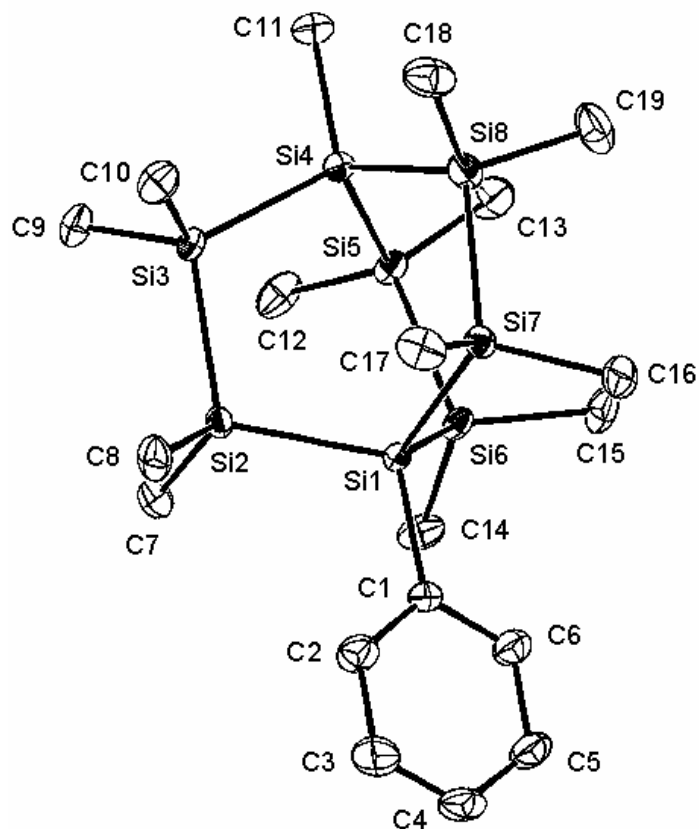

**Figure S1.** ORTEP drawing of 1-phenylbicyclo[2.2.2]octasilane. Hydrogen atoms are omitted for clarity. (30% thermal ellipsoide)

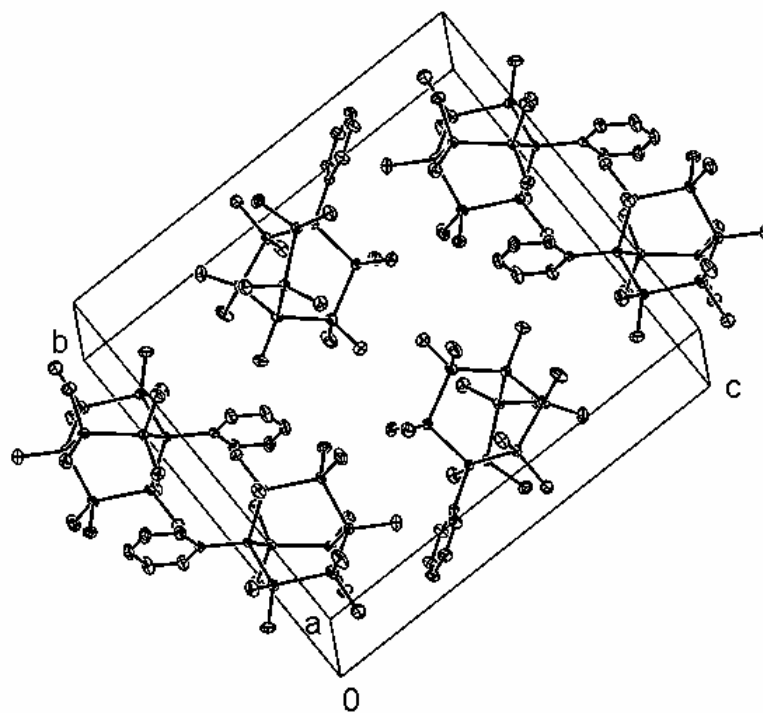

**Figure S2.** Packing of 1-phenylbicyclo[2.2.2]octasilane.

**Table S2.** Atomic coordinates ( $\times 10^4$ ) and equivalent isotropic displacement parameters ( $\text{\AA}^2 \times 10^3$ ) for 1-phenylbicyclo[2.2.2]octasilane (**1**).  $U(\text{eq})$  is defined as one third of the trace of the orthogonalized  $U^{ij}$  tensor.

|       | x        | y       | z       | $U(\text{eq})$ |
|-------|----------|---------|---------|----------------|
| Si(1) | 8030(1)  | 1889(1) | 4855(1) | 22(1)          |
| Si(2) | 10255(1) | 1992(1) | 5325(1) | 27(1)          |
| Si(3) | 10333(1) | 2912(1) | 6302(1) | 28(1)          |
| Si(4) | 8165(1)  | 3140(1) | 6707(1) | 29(1)          |
| Si(5) | 7186(1)  | 1860(1) | 6871(1) | 31(1)          |
| Si(6) | 6707(1)  | 1281(1) | 5736(1) | 28(1)          |
| Si(7) | 7186(1)  | 3202(1) | 4647(1) | 30(1)          |
| Si(8) | 6980(1)  | 3873(1) | 5782(1) | 39(1)          |
| C(1)  | 7937(2)  | 1255(1) | 3994(1) | 28(1)          |
| C(2)  | 9039(3)  | 1172(2) | 3564(1) | 49(1)          |
| C(3)  | 9003(3)  | 692(2)  | 2948(2) | 61(1)          |
| C(4)  | 7854(3)  | 284(2)  | 2751(1) | 54(1)          |
| C(5)  | 6742(3)  | 350(2)  | 3166(1) | 51(1)          |
| C(6)  | 6785(3)  | 832(2)  | 3782(1) | 43(1)          |
| C(7)  | 10821(3) | 953(1)  | 5639(2) | 44(1)          |
| C(8)  | 11499(2) | 2368(2) | 4650(1) | 47(1)          |
| C(9)  | 11499(3) | 2504(2) | 7039(1) | 46(1)          |
| C(10) | 11075(3) | 3903(2) | 5993(2) | 49(1)          |
| C(11) | 8213(3)  | 3736(2) | 7583(1) | 48(1)          |
| C(12) | 8365(3)  | 1167(2) | 7406(1) | 50(1)          |
| C(13) | 5590(3)  | 1951(2) | 7389(2) | 59(1)          |
| C(14) | 7011(3)  | 151(1)  | 5773(1) | 45(1)          |
| C(15) | 4854(2)  | 1463(2) | 5530(1) | 48(1)          |
| C(16) | 5503(3)  | 3163(2) | 4153(1) | 51(1)          |
| C(17) | 8351(3)  | 3788(2) | 4059(2) | 52(1)          |
| C(18) | 7659(4)  | 4944(2) | 5733(2) | 61(1)          |
| C(19) | 5137(3)  | 3974(2) | 5976(2) | 67(1)          |

**Table S3.** Bond lengths [Å] and angles [°] for 1-phenylbicyclo[2.2.2]octasilane (**1**).

|                   |            |                   |            |
|-------------------|------------|-------------------|------------|
| Si(1)-C(1)        | 1.906(2)   | C(10)-Si(3)-Si(4) | 109.63(9)  |
| Si(1)-Si(7)       | 2.3404(8)  | C(9)-Si(3)-Si(4)  | 112.01(9)  |
| Si(1)-Si(6)       | 2.3568(8)  | C(10)-Si(3)-Si(2) | 108.68(9)  |
| Si(1)-Si(2)       | 2.3573(8)  | C(9)-Si(3)-Si(2)  | 109.49(9)  |
| Si(2)-C(7)        | 1.882(2)   | Si(4)-Si(3)-Si(2) | 110.12(3)  |
| Si(2)-C(8)        | 1.895(2)   | C(11)-Si(4)-Si(5) | 110.42(9)  |
| Si(2)-Si(3)       | 2.3591(8)  | C(11)-Si(4)-Si(3) | 111.25(9)  |
| Si(3)-C(10)       | 1.884(2)   | Si(5)-Si(4)-Si(3) | 106.90(3)  |
| Si(3)-C(9)        | 1.886(2)   | C(11)-Si(4)-Si(8) | 110.87(9)  |
| Si(3)-Si(4)       | 2.3402(8)  | Si(5)-Si(4)-Si(8) | 110.50(3)  |
| Si(4)-C(11)       | 1.897(2)   | Si(3)-Si(4)-Si(8) | 106.77(3)  |
| Si(4)-Si(5)       | 2.3395(8)  | C(12)-Si(5)-C(13) | 107.27(14) |
| Si(4)-Si(8)       | 2.3753(9)  | C(12)-Si(5)-Si(4) | 110.81(8)  |
| Si(5)-C(12)       | 1.891(3)   | C(13)-Si(5)-Si(4) | 110.88(10) |
| Si(5)-C(13)       | 1.892(3)   | C(12)-Si(5)-Si(6) | 109.32(9)  |
| Si(5)-Si(6)       | 2.3442(8)  | C(13)-Si(5)-Si(6) | 109.91(9)  |
| Si(6)-C(14)       | 1.880(2)   | Si(4)-Si(5)-Si(6) | 108.63(3)  |
| Si(6)-C(15)       | 1.894(2)   | C(14)-Si(6)-C(15) | 108.49(13) |
| Si(7)-C(16)       | 1.882(3)   | C(14)-Si(6)-Si(5) | 109.90(8)  |
| Si(7)-C(17)       | 1.883(3)   | C(15)-Si(6)-Si(5) | 106.47(9)  |
| Si(7)-Si(8)       | 2.3930(9)  | C(14)-Si(6)-Si(1) | 110.43(9)  |
| Si(8)-C(18)       | 1.887(3)   | C(15)-Si(6)-Si(1) | 110.88(9)  |
| Si(8)-C(19)       | 1.888(3)   | Si(5)-Si(6)-Si(1) | 110.57(3)  |
| C(1)-C(6)         | 1.386(3)   | C(16)-Si(7)-C(17) | 106.91(13) |
| C(1)-C(2)         | 1.386(3)   | C(16)-Si(7)-Si(1) | 110.94(9)  |
| C(2)-C(3)         | 1.388(4)   | C(17)-Si(7)-Si(1) | 109.97(9)  |
| C(3)-C(4)         | 1.364(4)   | C(16)-Si(7)-Si(8) | 109.99(9)  |
| C(4)-C(5)         | 1.375(4)   | C(17)-Si(7)-Si(8) | 110.40(9)  |
| C(5)-C(6)         | 1.391(3)   | Si(1)-Si(7)-Si(8) | 108.63(3)  |
|                   |            | C(18)-Si(8)-C(19) | 106.20(16) |
| C(1)-Si(1)-Si(7)  | 110.93(6)  | C(18)-Si(8)-Si(4) | 109.68(10) |
| C(1)-Si(1)-Si(6)  | 109.87(7)  | C(19)-Si(8)-Si(4) | 111.55(10) |
| Si(7)-Si(1)-Si(6) | 107.36(3)  | C(18)-Si(8)-Si(7) | 110.15(10) |
| C(1)-Si(1)-Si(2)  | 111.48(7)  | C(19)-Si(8)-Si(7) | 108.81(10) |
| Si(7)-Si(1)-Si(2) | 108.76(3)  | Si(4)-Si(8)-Si(7) | 110.37(3)  |
| Si(6)-Si(1)-Si(2) | 108.32(3)  | C(6)-C(1)-C(2)    | 116.8(2)   |
| C(7)-Si(2)-C(8)   | 107.70(12) | C(6)-C(1)-Si(1)   | 121.74(17) |
| C(7)-Si(2)-Si(1)  | 108.45(8)  | C(2)-C(1)-Si(1)   | 121.42(17) |
| C(8)-Si(2)-Si(1)  | 114.00(8)  | C(1)-C(2)-C(3)    | 122.2(3)   |
| C(7)-Si(2)-Si(3)  | 109.84(9)  | C(4)-C(3)-C(2)    | 119.8(3)   |
| C(8)-Si(2)-Si(3)  | 107.20(9)  | C(3)-C(4)-C(5)    | 119.6(2)   |
| Si(1)-Si(2)-Si(3) | 109.59(3)  | C(4)-C(5)-C(6)    | 120.3(3)   |
| C(10)-Si(3)-C(9)  | 106.81(12) | C(1)-C(6)-C(5)    | 121.3(2)   |

Symmetry transformations used to generate equivalent atoms:

**Table S4.** Anisotropic displacement parameters ( $\text{\AA}^2 \times 10^3$ ) for 1-phenylbicyclo[2.2.2]octasilane (**1**). The anisotropic displacement factor exponent takes the form:  $-2\pi^2 [h^2 a^{*2} U^{11} + \dots + 2 h k a^* b^* U^{12}]$

|       | $U^{11}$ | $U^{22}$ | $U^{33}$ | $U^{23}$ | $U^{13}$ | $U^{12}$ |
|-------|----------|----------|----------|----------|----------|----------|
| Si(1) | 22(1)    | 24(1)    | 21(1)    | 0(1)     | 1(1)     | -2(1)    |
| Si(2) | 20(1)    | 31(1)    | 29(1)    | 0(1)     | 2(1)     | 1(1)     |
| Si(3) | 24(1)    | 30(1)    | 31(1)    | 0(1)     | -2(1)    | -5(1)    |
| Si(4) | 29(1)    | 30(1)    | 29(1)    | -5(1)    | 1(1)     | -1(1)    |
| Si(5) | 30(1)    | 40(1)    | 22(1)    | -1(1)    | 3(1)     | -10(1)   |
| Si(6) | 26(1)    | 34(1)    | 23(1)    | 0(1)     | 0(1)     | -11(1)   |
| Si(7) | 31(1)    | 30(1)    | 29(1)    | 2(1)     | -1(1)    | 5(1)     |
| Si(8) | 40(1)    | 47(1)    | 30(1)    | 2(1)     | 2(1)     | 11(1)    |
| C(1)  | 37(1)    | 24(1)    | 23(1)    | 2(1)     | -1(1)    | 2(1)     |
| C(2)  | 50(2)    | 62(2)    | 34(1)    | -8(1)    | 6(1)     | -6(1)    |
| C(3)  | 68(2)    | 81(2)    | 35(1)    | -16(1)   | 10(1)    | 8(2)     |
| C(4)  | 81(2)    | 50(2)    | 30(1)    | -10(1)   | -10(1)   | 17(1)    |
| C(5)  | 60(2)    | 50(2)    | 42(1)    | -10(1)   | -16(1)   | -1(1)    |
| C(6)  | 44(1)    | 47(1)    | 37(1)    | -7(1)    | -2(1)    | -3(1)    |
| C(7)  | 41(1)    | 38(1)    | 53(2)    | 1(1)     | -5(1)    | 13(1)    |
| C(8)  | 30(1)    | 67(2)    | 43(1)    | 5(1)     | 10(1)    | -4(1)    |
| C(9)  | 38(1)    | 58(2)    | 42(1)    | -1(1)    | -14(1)   | -3(1)    |
| C(10) | 47(2)    | 44(1)    | 55(2)    | 3(1)     | 3(1)     | -19(1)   |
| C(11) | 55(2)    | 50(2)    | 40(1)    | -18(1)   | 1(1)     | 0(1)     |
| C(12) | 65(2)    | 46(1)    | 39(1)    | 13(1)    | -17(1)   | -16(1)   |
| C(13) | 49(2)    | 87(2)    | 42(2)    | -16(1)   | 23(1)    | -19(2)   |
| C(14) | 64(2)    | 33(1)    | 40(1)    | 0(1)     | 5(1)     | -16(1)   |
| C(15) | 29(1)    | 77(2)    | 39(1)    | 0(1)     | -1(1)    | -16(1)   |
| C(16) | 46(2)    | 65(2)    | 40(1)    | -1(1)    | -16(1)   | 16(1)    |
| C(17) | 69(2)    | 38(1)    | 50(2)    | 14(1)    | 15(1)    | -1(1)    |
| C(18) | 90(2)    | 42(2)    | 51(2)    | 2(1)     | 1(2)     | 14(2)    |
| C(19) | 47(2)    | 111(3)   | 43(2)    | 0(2)     | 7(1)     | 32(2)    |

**Table S5.** Hydrogen coordinates ( $\times 10^4$ ) and isotropic displacement parameters ( $\text{\AA}^2 \times 10^{-3}$ ) for 1-phenylbicyclo[2.2.2]octasilane (**1**).

|        | x     | y    | z    | U(eq) |
|--------|-------|------|------|-------|
| H(2)   | 9846  | 1453 | 3695 | 58    |
| H(3)   | 9776  | 648  | 2665 | 73    |
| H(4)   | 7823  | -45  | 2329 | 65    |
| H(5)   | 5941  | 66   | 3031 | 61    |
| H(6)   | 6008  | 872  | 4064 | 51    |
| H(7A)  | 10196 | 745  | 5992 | 66    |
| H(7B)  | 11725 | 992  | 5864 | 66    |
| H(7C)  | 10837 | 582  | 5226 | 66    |
| H(8A)  | 11228 | 2909 | 4477 | 70    |
| H(8B)  | 11516 | 1989 | 4243 | 70    |
| H(8C)  | 12397 | 2399 | 4883 | 70    |
| H(9A)  | 11152 | 1984 | 7213 | 69    |
| H(9B)  | 11556 | 2895 | 7438 | 69    |
| H(9C)  | 12395 | 2421 | 6849 | 69    |
| H(10A) | 10496 | 4137 | 5608 | 73    |
| H(10B) | 11972 | 3803 | 5810 | 73    |
| H(10C) | 11144 | 4284 | 6399 | 73    |
| H(11A) | 8624  | 4270 | 7506 | 72    |
| H(11B) | 8744  | 3435 | 7950 | 72    |
| H(11C) | 7295  | 3810 | 7746 | 72    |
| H(12A) | 9205  | 1105 | 7151 | 76    |
| H(12B) | 7943  | 632  | 7461 | 76    |
| H(12C) | 8558  | 1405 | 7883 | 76    |
| H(13A) | 4953  | 2307 | 7125 | 89    |
| H(13B) | 5800  | 2183 | 7866 | 89    |
| H(13C) | 5189  | 1410 | 7443 | 89    |
| H(14A) | 7967  | 47   | 5879 | 68    |
| H(14B) | 6748  | -93  | 5307 | 68    |
| H(14C) | 6477  | -90  | 6151 | 68    |
| H(15A) | 4679  | 2051 | 5510 | 72    |
| H(15B) | 4326  | 1217 | 5908 | 72    |
| H(15C) | 4599  | 1217 | 5064 | 72    |
| H(16A) | 4864  | 2864 | 4443 | 76    |
| H(16B) | 5596  | 2887 | 3689 | 76    |
| H(16C) | 5172  | 3719 | 4070 | 76    |
| H(17A) | 9242  | 3823 | 4299 | 78    |
| H(17B) | 7994  | 4339 | 3978 | 78    |
| H(17C) | 8421  | 3508 | 3596 | 78    |
| H(18A) | 8619  | 4926 | 5633 | 91    |
| H(18B) | 7535  | 5221 | 6194 | 91    |
| H(18C) | 7176  | 5243 | 5347 | 91    |
| H(19A) | 4735  | 3431 | 6009 | 100   |
| H(19B) | 4680  | 4281 | 5586 | 100   |
| H(19C) | 5041  | 4264 | 6433 | 100   |



**Table S6.** Torsion angles [°] for 1-phenylbicyclo[2.2.2]octasilane (**1**).

|                         |             |
|-------------------------|-------------|
| Si(2)-Si(1)-C(1)-C(2)   | -24.5(2)    |
| Si(6)-Si(1)-C(1)-C(2)   | -144.58(18) |
| Si(7)-Si(1)-C(1)-C(2)   | 96.87(19)   |
| Si(1)-Si(2)-Si(3)-Si(4) | 16.10(4)    |
| Si(1)-Si(6)-Si(5)-Si(4) | 21.15(4)    |
| Si(1)-Si(7)-Si(8)-Si(4) | 13.73(5)    |

## 2. Fluorescence Spectra of Phenyl[tris(trimethylsilyl)]silane (**4**) in Various Solvents

Phenyl[tris(trimethylsilyl)]silane (**4**) shows no ICT fluorescence in non-polar hexane as described in text; **4** shows only a weak LE fluorescence at 290 nm. Compound **4** however shows a very weak ICT fluorescence band at 340 and 360 nm in polar CH<sub>2</sub>Cl<sub>2</sub> and CH<sub>3</sub>CN solvents, respectively, together with the LE fluorescence (Figure S3). The weak ICT fluorescence of **4** in polar solvents is in accord with the existence of a mechanism to stabilize the ICT state in polar solvents different from the OICT mechanism, as shown in our previous papers.<sup>\*1</sup>

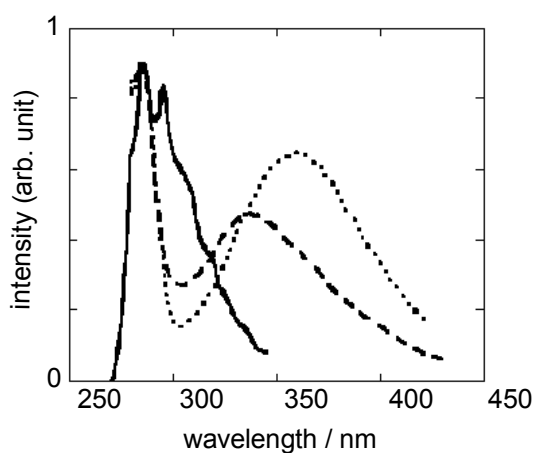

**Figure S3.** Fluorescence spectra of phenyltris(trimethylsilyl)silane (**4**); (a) in hexane (solid line); (b) in dichloromethane (dashed line); (c) in acetonitrile (right, dotted line).

\*1. (a) H. Sakurai, H. Sugiyama and M. Kira, *J. Phys. Chem.*, 1990, **94**, 1837. (b) M. Kira, T. Miyazawa, H. Sugiyama, M. Yamaguchi and H. Sakurai, *J. Am. Chem. Soc.*, 1993, **115**, 3116.
